# Supplementary material for: An unbiased resource of novel SNP markers provides a new chronology for the human Y chromosome and reveals a deep phylogenetic structure in Africa
Source: HighWire-hosted journal article supplement (doi:10.1101/gr.160788.113), 2014-01-06
Supplement: Supplemental_text.docx [file Supplemental_text.docx]

**Supplemental Text**

**An unbiased resource of novel SNP markers provides a new chronology for the human Y chromosome and reveals a deep phylogenetic structure in Africa**

Rosaria Scozzari,Andrea Massaia,Beniamino Trombetta,Giovanna Bellusci,Natalie M. Myres, Andrea Novelletto, Fulvio Cruciani

**Supplemental Discussion**

*Mutational pattern and evidence for selection*

One main question related to our approach is whether the set of DNA segments subjected to capture faithfully summarized the pattern and tempo of mutations in the entire MSY. For example, the exclusion of largely represented paralogous regions prone to ectopic gene-conversion (Rozen et al. 2003; Bosch et al. 2004; Rosser et al. 2009; Cruciani et al. 2010; Trombetta et al. 2010) may have prevented the identification of a non-trivial proportion of variants. However, excluding paralogous regions likely caused the remaining amount of DNA (that captured here) to behave in a more similar manner to the autosomes. Recent works (Awadalla et al. 2010; Roach et al. 2010; The 1000 Genomes Project Consortium 2010; Campbell et al. 2012; Kong et al. 2012; Michaelson et al. 2012) raise questions that challenge the transfer of the *de novo* autosomal mutation rate to MSY evolutionary studies. However, many aspects of the pool of variants here discovered resemble the pattern observed among genome-wide *de novo* events, including the transition/transversion ratio, the proportion of mutations at CpG dinucleotides, and the shift from strongly bound to weakly bound base pairs. This justifies the use of an autosome-derived *de novo* mutation rate, also if one considers that convergence is being observed between evolutionarily- and pedigree-derived estimates (Scally and Durbin 2012). In deriving our rate, we took into account the effect of the transmission through the male germline only, but could not account for other unknown specificities of the Y chromosome.

Our data denote an enrichment of putatively physiologically relevant mutations along terminal branches. Initial suggestions for purifying selection in the MSY were put forward by Rozen et al. (2009) based on the non-synonymous/synonymous diversity in 16 single-copy X-degenerate genes. When performing the same calculations on our data, we obtained an approximate Ka/Ks ratio of 0.45, in line with effective purifying selection. As an alternative approach, we pooled our results together with those by Rozen et al. (2009) and Wei et al. (2013) (Supplemental Table S4), counting the number of shared and private mutant alleles across the males represented in the three studies. In this way, we found a significant excess of private missense variants (P = 0.01, Fisher exact test) [see Pereira et al. (2011) for a similar finding in mtDNA]. Among these, we found two potentially damaging mutations in *USP9Y,* a gene which is possibly involved in spermatogenesis. Both of these were found in very young terminal branches (< 10.5 kya). It should be noted, however, that the complete deletion (Luddi et al. 2009) and additional missense mutations (Rozen et al. 2009; Wei et al. 2013) in this gene were found to be heritable and, in one case, compatible with the spread to a large number of males (Rozen et al. 2009), making it unlikely that *USP9Y* alone could be a cause of severe infertility [for a comment on this issue see Tyler-Smith and Krausz (2009)].

In summary, we cannot exclude that purifying selection has shaped the MSY tree to some extent, particularly when considering that the absence of recombination leads to the removal of all markers on a selected-against MSY haplotype [see Repping et al. (2004) and Tyler-Smith and Krausz (2009) for possible compensatory mechanisms]. Nevertheless, the features of our mutational pattern strongly suggest that in the MSY a large proportion of newly arisen alleles have survived in the phylogeny.

Based on all the above arguments and the fact that only 1% of the sequence here screened is coding, we confidently applied genetic dating equating the substitution rate to the mutation rate over all positions, in the same way as other authors (Mendez et al. 2013; Wei et al. 2013).

**Supplemental Methods**

*DNA library preparation*

About 3 μg of genomic DNA was sheared using a Covaris ultrasonicator to obtain DNA fragments that were mainly distributed between 200bp and 300bp. Purified fragments were end-repaired and ligated to paired-end sequencing adapters containing short sample-specific sequence tags to allow multiple samples to be simultaneously analyzed during the sequencing step. The samples were then amplified by LM-PCR (Ligation-Mediated PCR) in order to selectively enrich those DNA fragments that have adapter molecules on both ends.

*Sequence alignment*

The raw sequencing output was processed in order to discard low quality reads, adapter contamination and repeated reads. Clean data were then sorted using subject-specific identifiers (see previous section). For each subject, the sequencing reads were aligned to the human Y chromosome reference sequence (GRCh37/hg19) using the Burrows-Wheeler Aligner (BWA) software (Li and Durbin 2009), to generate an alignment file (.sam, Sequence Alignment/Map) (Li et al. 2009a).Library preparation, targeting, sequencing and alignment were performed by BGI-Tech (Shenzhen, China).

*SNP data quality control*

To assess the accuracy of our set of filtered variants, we performed a series of quality controls using both resequencing and literature data.

In order to test for false positives, a total of 80 SNPs (here described for the first time) were tested and confirmed using either Sanger resequencing or RFLP assays. Also, one individual (S38 in Supplemental Table S1) had also been sequenced in a previous study (Cruciani et al. 2011), allowing the comparison of 39,859 bp of overlapping MSY sequence. Neither false positives nor false negatives were discovered.

We also compared our variants with those reported in a recent high-coverage resequencing study of the MSY (Wei et al. 2013). In order to check nucleotide positions with a high probability of displaying variation in both studies, we selected SNPs reported by Wei et al. (2013) to define haplogroups DR and DE. Among 53 SNPs falling within the MSY regions here sequenced, a 100% concordance was observed between the two data sets. Additionally, we compared the allelic states reported in sample NA21313 (Wei et al. 2013) with those we observed in sample NA21367 (S11 in Supplemental Table S1). Since these two individuals belong to the same population and share the same terminal MSY haplogroup (A-M13), we expected them to share most of their alleles at variable positions. All but one of the 76 alternative alleles in sample NA21313 which were in regions analyzed in the present study were also observed in sample NA21367.

Finally we confirmed the allele state at all positions described by Mendez et al. (2013) which define haplogroups A0-T and A0 and which reside within the DNA segments captured by our experimental protocol.

*Reconstruction of ancestral allele states*

For each variable position, the filtered data consisted in the listing of subjects carrying an alternative base, i.e. a base call which differed from the reference sequence (GRCh37/hg19). We then determined the ancestral and derived state at each position in the entire phylogeny using the following procedure, which takes into account that A1b (A0) is one of the deepest branches of the MSY tree (Cruciani et al. 2011b; Scozzari et al. 2012): alternative bases in one or more (but not all) A1b subjects (S01, S03, S04, and S05) were considered derived; alternative bases in one or more (but not all) of the remaining subjects were considered ancestral if shared with subject S01 and derived otherwise; the ancestral state at the 158 positions remaining after these steps was determined by comparison with the orthologous positions of the chimpanzee (CSAC 2.1.4). This led to 94 and 28 mutations which were unambiguously attributed to branches 1 and 8, respectively (Supplemental Fig. S2); the ancestral state at 36 positions remained undetermined (see footnotes to Supplemental Table S2). We chose this method to avoid uncertainties associated with the straightforward application of the human-chimp comparison. In fact, mutations occurring in the chimpanzee lineage may result in the erroneous assignment of human alleles as derived alleles (estimated genome-wide rate 0.5%). This problem is particularly acute for the Y chromosome, for which an enhanced divergence between the two species has been reported (Chimpanzee Sequencing and Analysis Consortium 2005). The position of the root in the MP tree was determined by partitioning the 36 mutations with unknown ancestral state (Supplemental Table S2) proportionally to those that had been unambiguously assigned to branches 1 and 8, respectively (28 and 8 assigned, respectively, bold in Fig. 2 and S2).

We used the ancestral allele information also to count the number of mutations occurring at ancestral CpG dinucleotides.

*Mutation rate*

We used the repeatedly confirmed genome-wide value of 1.2 × 10-8/position/gamete/generation to infer an MSY-specific value. To this aim, we considered a 4:1 alpha ratio (Campbell et al. 2012; Kong et al. 2012) and the strict patrilinear inheritance of the MSY. We obtained the value of 0.64 × 10-9/position/gamete/year (assuming 30 years/generation), i.e. a very similar value to that of Mendez et al. (2013) who incorporated the regression on paternal age in the estimation. Here we notice that, in the multigenerational timescale for the MSY, the *de novo* mutation rate per year is less sensitive to paternal age compared to the rate per generation. In fact, fathering at an old age implies a higher mutation rate but also corresponds to a longer inter-generation interval for the Y chromosome. Based on the data reported in Fig. 2 of Kong et al. (2012), we were able to calculate that a shift of the average paternal age from 20 to 30 years corresponds to an increase of 40% in the rate per generation (44 vs. 64 total mutations under the linear model) but only a moderate decrease of the rate per year (2.2 vs. 2.13 total mutations). We obtained the 95% C.I. for our mutation rate (0.47 - 0.82 × 10-9) with 10,000 simulations of Poisson-distributed mutational events in the paternal and maternal gametes, with averages from Kong et al. (2012). In summary, our rate is somewhat lower than that calculated by directly examining the MSY transmission in a single deep-rooted pedigree (Xue et al. 2009), but its estimation is indirectly based on a much larger number of mutational events. Also, our value is similar to that obtained in a comparative genomics perspective (about 0.70 × 10-9)by applying the same calculations to the divergence between humans and great apes with the alpha ratio reported therein (Scally et al. 2012). Two recent papers have recalculated an evolutionary effective rate by calibrating the age of a limited number of nodes on known MSY founding events. Of the two values, one based on the Neolithic population expansion in Sardinia [0.65 x 10-9 (Francalacci et al. 2013)] turned out to be very similar to that used here, while the one based on the initial colonization of the Americas [0.82 x 10-9 (Poznik et al. 2013)] is at the upper limit of our C.I.

*Bayesian estimation of node ages*

For BEAST analysis we used a GTR model for nucleotide substitutions under a lognormal relaxed clock for rate heterogeneity across branches. The initial tree was that obtained by maximum parsimony (see main text). The prior for the substitution rate was given a normal distribution centered on the mutation rate value reported above. An expansion model was used for the population size in order to appropriately account for the faster recent growth (Gignoux et al. 2011; Keinan and Clark 2012). Rather flat priors were used, i.e. lognormal[10,3] for the current population size, exp[0.2] for the ancestral/current population size ratio and uniform[0, 0.00133] for the growth rate/year in the expansion phase, using the upper limit reported in the literature for pre-agricultural cultures (Ammerman and Cavalli-Sforza 1984; Boone 2002; Hamilton et al. 2009). We used two runs of 20 million steps each, sampled every 10,000 steps. The initial 20% of each run was discarded as burn-in and the outputs combined and analyzed with Tracer.

**References**

Ammerman AJ and Cavalli-Sforza LL. 1984. *The Neolithic transition and the genetics of populations in Europe*. Princeton University Press, Princeton.

Awadalla P, Gauthier J, Myers RA, Casals F, Hamdan FF, Griffing AR, Coté M, Henrion E, Spiegelman D, Tarabeux J et al. 2010. Direct measure of the de novo mutation rate in autism and schizophrenia cohorts. *Am J Hum Genet* **87:** 316-324.

Boone JL. 2002. Subsistence strategies and early human population history: an evolutionary ecological perspective *World Archaeol* **34:** 6-25.

Bosch E, Hurles ME, Navarro A, Jobling MA. 2004. Dynamics of a human interparalog gene conversion hotspot. *Genome Res* **14:** 835-844.

Campbell CD, Chong JX, Malig M, Ko A, Dumont BL, Han L, Vives L, O'Roak BJ, Sudmant PH, Shendure J et al. 2012. Estimating the human mutation rate using autozygosity in a founder population. *Nat Genet* **44:** 1277-1281.

Cruciani F, Trombetta B, Macaulay V, Scozzari R. 2010. About the X-to-Y Gene Conversion Rate. *Am J Hum Genet* **86:** 495-497.

Cruciani F, Trombetta B, Massaia A, Destro-Bisol G, Sellitto D, Scozzari R. 2011. A revised root for the human Y chromosomal phylogenetic tree: the origin of patrilineal diversity in Africa. *Am J Hum Genet* **88:** 814-818.

Francalacci P, Morelli L, Angius A, Berutti R, Reinier F, Atzeni R, Pilu R, Busonero F, Maschio A, Zara I et al. 2013. Low-pass DNA sequencing of 1200 Sardinians reconstructs European Y-chromosome phylogeny. *Science* **341:** 565-569.

Gignoux CR, Henn BM, Mountain JL. 2011. Rapid, global demographic expansions after the origins of agriculture. *Proc Natl Acad Sci USA* **108:** 6044-6049.

Hamilton MJ, Burger O, DeLong JP, Walker RS, Moses ME, Brown JH. 2009. Population stability, cooperation, and the invasibility of the human species. *Proc Natl Acad Sci USA* **106:** 12255-12260.

Keinan A and Clark AG. 2012. Recent explosive human population growth has resulted in an excess of rare genetic variants. *Science* **336:** 740-743.

Kong A, Frigge ML, Masson G, Besenbacher S, Sulem P, Magnusson G, Gudjonsson SA, Sigurdsson A, Jonasdottir A, Jonasdottir A et al. 2012. Rate of *de novo* mutations and the importance of father's age to disease risk. *Nature* **488:** 471-475.

Li H and Durbin R. 2009. Fast and accurate short read alignment with Burrows-Wheeler transform. *Bioinformatics* **25:** 1754-1760.

Luddi A, Margollicci M, Gambera L, Serafini F, Cioni M, De Leo V, Balestri P, Piomboni P. 2009. Spermatogenesis in a man with complete deletion of *USP9Y*. *N Engl J Med* **360:** 881-885.

Mendez FL, Krahn T, Schrack B, Krahn AM, Veeramah KR, Woerner AE, Fomine FLM, Bradman N, Thomas MG, Karafet TM et al. 2013. An African American paternal lineage adds an extremely ancient root to the human Y chromosome phylogenetic tree. *Am J Hum Genet* **92:** 454-459.

Michaelson JJ, Shi Y, Gujral M, Zheng H, Malhotra D, Jin X, Jian M, Liu G, Greer D, Bhandari A et al. 2012. Whole-genome sequencing in autism identifies hot spots for de novo germline mutation. *Cell* **151:** 1431-1442.

Pereira L, Soares P, Radivojac P, Li B, Samuels DC. 2011. Comparing phylogeny and the predicted pathogenicity of protein variations reveals equal purifying selection across the global human mtDNA diversity. *Am J Hum Genet* **88**:433-439.

Poznik GD, Henn BM, Yee M-C, Sliwerska E, Euskirchen GM, Lin AA, Snyder M, Quintana-Murci L, Kidd JM, Underhill PA et al. 2013. Sequencing Y chromosomes resolves discrepancy in time to common ancestor of males versus females. *Science* **341:** 562-565.

Repping S, van Daalen SK, Korver CM, Brown LG, Marszalek JD, Gianotten J, Oates RD, Silber S, van der Veen F, Page DC et al. 2004. A family of human Y chromosomes has dispersed throughout northern Eurasia despite a 1.8-Mb deletion in the azoospermia factor c region. *Genomics* **83:** 1046-1052.

Roach JC, Glusman G, Smit AF, Huff CD, Hubley R, Shannon PT, Rowen L, Pant KP, Goodman N, Bamshad M et al. 2010. Analysis of genetic inheritance in a family quartet by whole-genome sequencing. *Science* **328:** 636-639.

Rosser ZH, Balaresque P, Jobling MA. 2009. Gene conversion between the X chromosome and the male-specific region of the Y chromosome at a translocation hotspot. *Am J Hum Genet* **85:** 130-134.

Rozen S, Marszalek JD, Alagappan RK, Skaletsky H, Page DC. 2009. Remarkably little variation in proteins encoded by the Y chromosome's single-copy genes, implying effective purifying selection. *Am J Hum Genet* **85:** 923-928.

Rozen S, Skaletsky H, Marszalek JD, Minx PJ, Cordum HS, Waterston RH, Wilson RK, Page DC. 2003. Abundant gene conversion between arms of palindromes in human and ape Y chromosomes. *Nature* **423:** 873-876.

Scally A and Durbin R. 2012. Revising the human mutation rate: implications for understanding human evolution. *Nat Rev Genet* **13:** 745-753 and erratum in **13:** 824.

Scally A, Dutheil JY, Hillier LW, Jordan GE, Goodhead I, Herrero J, Hobolth A, Lappalainen T, Mailund T, Marques-Bonet T et al. 2012. Insights into hominid evolution from the gorilla genome sequence. *Nature* **483:** 169-175.

Scozzari R, Massaia A, D'Atanasio E, Myres NM, Perego UA, Trombetta B, Cruciani F. 2012. Molecular dissection of the basal clades in the human Y chromosome phylogenetic tree. *PLoS ONE* **7:** e49170.

The 1000 Genomes Project Consortium. 2010. A map of human genome variation from population-scale sequencing. *Nature* **467:** 1061-1073.

Trombetta B, Cruciani F, Underhill PA, Sellitto D, Scozzari R. 2010. Footprints of X-to-Y gene conversion in recent human evolution. *Mol Biol Evol* **27:** 714-725.

Tyler-Smith C and Krausz C. 2009. The will-o'-the-wisp of genetics – hunting for the azoospermia factor gene. *N Engl J Med* **360:** 925-927.

Wei W, Ayub Q, Chen Y, McCarthy S, Hou Y, Carbone I, Xue Y, Tyler-Smith C. 2013. A calibrated human Y-chromosomal phylogeny based on resequencing. *Genome Res* **23:** 388-395.

Xue Y, Wang Q, Long Q, Ng BL, Swerdlow H, Burton J, Skuce C, Taylor R, Abdellah Z, Zhao Y et al. 2009. Human Y chromosome base-substitution mutation rate measured by direct sequencing in a deep-rooting pedigree. *Cur Biol* **19:** 1453-1457.
