# Supplementary material for: An unbiased resource of novel SNP markers provides a new chronology for the human Y chromosome and reveals a deep phylogenetic structure in Africa
Source: HighWire-hosted journal article supplement (doi:10.1101/gr.160788.113), 2014-01-06
Supplement: Table_S4.xlsx [file Table_S4.xlsx]

## Sheet: Table S6
Table S4: List of mutations in protein coding regions.
Y-position (GRCh37/hg19)	Gene	Reference allele	Alternative allele	Class of variant	Amino acid change	PhyloP score	PhyloP prediction	PolyPhen2 score	PolyPhen2 prediction	dbSNP135	Shareda	Referencesb
2655180	SRY	G	A	synonymous	S155S					rs11575897	yes	(3)
2710013	RPS4Y1	A	G	nonsynonymous	K10R						no	(1)
2712132	RPS4Y1	G	A	synonymous	S32S						yes	(3)
2722727	RPS4Y1	C	T	synonymous	Y149Y					rs72625370	no	(3)
2734854	RPS4Y1	C	T	synonymous	S237S					rs35284970	yes	(1), (3)
2829444	ZFY	A	G	nonsynonymous	M105V	0.980637	Conserved	0.214	Possibly damaging	rs72625387	no	(3)
2846005	ZFY	A	G	nonsynonymous	N292S	0.779215	Non-conserved	0.0070	Benign		no	(2)
6736154	AMELY	C	T	nonsynonymous	R166Q	0.768809	Non-conserved	0.0	NA	rs2071394	no	(3)
6736443	AMELY	C	T	nonsynonymous	V70M	0.164805	Non-conserved	0.324	Possibly damaging	rs35815655	no	(3)
6736812	AMELY	G	T	synonymous	L36L					rs34820858	no	(3)
6958165	TBL1Y	C	A	synonymous	G494G					rs34137545	yes	(3)
14832620	USP9Y	G	T	nonsynonymous	E65D	0.972962	Conserved	0.011	Benign	rs7067496	yes	(1), (2), (3)
14834046	USP9Y	G	A	nonsynonymous	R84Q	0.974416	Conserved	0.955	Probably damaging		no	(1)
14838700	USP9Y	C	T	nonsynonymous	R211C	0.246587	Non-conserved	0.0	Benign	rs2032596	yes	(2), (3)
14851554	USP9Y	T	C	synonymous	D471D					rs2032599	yes	(1), (3)
14870505	USP9Y	G	T	nonsynonymous	V567L	0.983019	Conserved	0.927	Probably damaging		no	(1)
14888783	USP9Y	A	C	synonymous	L876L					rs2032600	yes	(1), (3)
14889974	USP9Y	C	T	synonymous	L887L					rs34601266	no	(3)
14898163	USP9Y	G	A	nonsynonymous	A1060T	0.972962	Conserved	0.0	Benign	rs20320	yes	(3)
14898546	USP9Y	C	A	nonsynonymous	P1125H	0.974416	Conserved	0.0	Benign		no	(1)
14902414	USP9Y	G	A	synonymous	E1212E					rs20321	no	(3)
14902417	USP9Y	C	T	synonymous	C1213C						no	(1)
14924869	USP9Y	C	T	synonymous	P1497P					rs2032605	yes	(3)
14952467	USP9Y	A	G	synonymous	Q2005Q						no	(1)
14954280	USP9Y	T	C	synonymous	P2109P					rs2032602	yes	(2), (3)
14959237	USP9Y	C	G	nonsynonymous	S2350C	0.971948	Conserved	0.998	Probably damaging		no	(2)
14968331	USP9Y	G	A	synonymous	S2377S					rs9341284	no	(3)
15024924	DDX3Y	G	A	nonsynonymous	D163N	0.780229	Non-conserved	0.995	Probably damaging	rs72625303	no	(3)
15026544	DDX3Y	G	T	nonsynonymous	A64S	0.108136	Non-conserved	0.0	Benign	rs111406208	no	(1)
15027863	DDX3Y	G	A	synonymous	E227E						yes	(1)
15028176	DDX3Y	G	C	nonsynonymous	S254T	0.975056	Conserved	0.0	Benign	rs72625359	yes	(1), (3)
15028931	DDX3Y	T	C	synonymous	Y390Y						no	(1)
15346546	UTY	C	A	nonsynonymous	M1056I						no	(2)
15435237	UTY	T	C	nonsynonymous	M762V						no	(2)
15435514	UTY	C	T	nonsynonymous	R451H	0.838203	Non-conserved	0.0060	Benign		no	(1)
15467824	UTY	A	G	synonymous	S114S					rs2032654	yes	(1), (2), (3)
15591193	UTY	G	A	nonsynonymous	L53F	0.781742	Non-conserved	0.028	Benign		no	(1)
15591445	UTY	T	C	nonsynonymous	E34G	0.041684	Non-conserved	0.0010	Benign	rs9341273	no	(1)
15591537	UTY	G	C	synonymous	S3S					rs2032653	yes	(1), (2), (3)
16936081	NLGN4Y	C	T	synonymous	T45T					rs35394227	no	(3)
16942397	NLGN4Y	T	C	synonymous	T365T					rs72625367	no	(3)
21154426	CD24	G	A	nonsynonymous	A57V					rs52812045	no	(2)
21751440	TXLNG2P	A	C	nonsynonymous	N106T					rs72622300	no	(3)
21751449	TXLNG2P	C	T	nonsynonymous	S109L					rs34289137	yes	(3)
21867887	KDM5D	C	A	nonsynonymous	Q713H	0.190533	Non-conserved	0.0	Benign		no	(2)
21868068	KDM5D	C	T	nonsynonymous	R653Q	0.084134	Non-conserved	0.0	Benign	rs35681523	no	(3)
21868726	KDM5D	T	C	synonymous	G516G					rs2032633	yes	(3)
21869264	KDM5D	G	A	synonymous	P431P					rs2032620	no	(3)
21869923	KDM5D	C	T	nonsynonymous	S274N	0.95	Non-conserved	0.051	Benign	rs35247789	no	(3)
21869928	KDM5D	T	C	synonymous	S272S					rs72625375	no	(3)
21897321	KDM5D	T	C	nonsynonymous	T239A	0.17099	Non-conserved	0.0010	Benign		no	(2)
22921768	RPS4Y2	G	A	synonymous	S32S					rs34581739	yes	(2), (3)
22942897	RPS4Y2	T	C	synonymous	A257A					rs34459399	yes	(3)
a Here we consider a mutation to be "shared" if the alternative allele is independently found in different studies, or in different individuals from a single study
b (1) = present study; (2) = Wei et al. (2013); (3) = Rozen et al. (2009)
