# Supplementary material for: An unbiased resource of novel SNP markers provides a new chronology for the human Y chromosome and reveals a deep phylogenetic structure in Africa
Source: HighWire-hosted journal article supplement (doi:10.1101/gr.160788.113), 2014-01-06
Supplement: Table_S9.xlsx [file Table_S9.xlsx]

## Sheet: Table S3
Table S9: List and genomic coordinates of the 5,274 fragments of the capture probe set covering the 5 selected MSY regions.
Fragment number	Start position (GRCh37/hg19)	End position (GRCh37/hg19)	Size (bp)
1	2690918	2691044	127
2	2691434	2691624	191
3	2691955	2692565	611
4	2693048	2693225	178
5	2693500	2694424	925
6	2694462	2694561	100
7	2694646	2694887	242
8	2695072	2695239	168
9	2695286	2695440	155
10	2695686	2695789	104
11	2695952	2696304	353
12	2700417	2700530	114
13	2704044	2704142	99
14	2704368	2704503	136
15	2706129	2706441	313
16	2707644	2707845	202
17	2707887	2707985	99
18	2708182	2708317	136
19	2708504	2708609	106
20	2708918	2709073	156
21	2709115	2712151	3037
22	2712190	2712283	94
23	2712315	2712393	79
24	2712806	2713178	373
25	2713186	2714019	834
26	2714174	2714378	205
27	2714407	2714847	441
28	2714863	2715765	903
29	2715791	2716046	256
30	2716204	2716815	612
31	2717169	2717311	143
32	2717351	2718872	1522
33	2719184	2721875	2692
34	2722171	2722493	323
35	2722496	2722726	231
36	2722769	2722862	94
37	2722866	2723835	970
38	2723863	2724011	149
39	2724077	2724187	111
40	2724467	2724593	127
41	2724883	2725110	228
42	2726729	2726899	171
43	2727261	2727462	202
44	2727560	2727761	202
45	2727863	2728063	201
46	2728638	2728774	137
47	2729302	2729648	347
48	2730285	2730368	84
49	2730558	2731671	1114
50	2731707	2732329	623
51	2732362	2732434	73
52	2732436	2733022	587
53	2733028	2733267	240
54	2733285	2733909	625
55	2734223	2735222	1000
56	2735398	2735599	202
57	2736339	2736559	221
58	2736851	2737049	199
59	2737075	2738269	1195
60	2738633	2738749	117
61	2739091	2739197	107
62	2739321	2739572	252
63	2739632	2740052	421
64	2740843	2740955	113
65	2742306	2742493	188
66	2742618	2743105	488
67	2744361	2744552	192
68	2745461	2745579	119
69	2746186	2746637	452
70	2746945	2747763	819
71	2747849	2748251	403
72	2748553	2749039	487
73	2749420	2750560	1141
74	2750859	2751370	512
75	2751469	2751640	172
76	2751732	2752243	512
77	2752838	2752897	60
78	2755399	2755553	155
79	2756577	2756777	201
80	2757115	2757312	198
81	2757511	2757592	82
82	2757749	2757865	117
83	2757888	2758023	136
84	2758999	2759127	129
85	2759240	2759365	126
86	2759668	2759746	79
87	2760161	2760362	202
88	2761424	2761525	102
89	2761741	2761941	201
90	2762589	2762676	88
91	2764005	2764821	817
92	2764875	2766662	1788
93	2766995	2767356	362
94	2767658	2767765	108
95	2774230	2774616	387
96	2775548	2776159	612
97	2776507	2776736	230
98	2776776	2777571	796
99	2777714	2777833	120
100	2777844	2777993	150
101	2779040	2779241	202
102	2779254	2779571	318
103	2781215	2781319	105
104	2781380	2781499	120
105	2783649	2783718	70
106	2783765	2784047	283
107	2784099	2784231	133
108	2785567	2785819	253
109	2787501	2787623	123
110	2787638	2787677	40
111	2793146	2793289	144
112	2793891	2793989	99
113	2793994	2794165	172
114	2794377	2794577	201
115	2794799	2794933	135
116	2795283	2795542	260
117	2795821	2796021	201
118	2796162	2796282	121
119	2796374	2796487	114
120	2796872	2796917	46
121	2796957	2797086	130
122	2797411	2798384	974
123	2799110	2799310	201
124	2799709	2799909	201
125	2800510	2800784	275
126	2800822	2801450	629
127	2801548	2801730	183
128	2801975	2802217	243
129	2802361	2802809	449
130	2802811	2803306	496
131	2803421	2805262	1842
132	2805555	2806029	475
133	2806350	2806474	125
134	2806519	2806626	108
135	2806895	2807024	130
136	2807073	2807756	684
137	2807783	2808508	726
138	2808549	2808800	252
139	2808950	2809151	202
140	2809165	2809365	201
141	2809860	2809975	116
142	2810917	2811322	406
143	2811622	2811823	202
144	2812104	2812304	201
145	2812534	2812776	243
146	2813087	2813501	415
147	2813804	2813929	126
148	2813947	2814060	114
149	2814104	2814165	62
150	2814291	2814707	417
151	2815071	2815530	460
152	2815569	2816274	706
153	2816404	2816604	201
154	2816710	2816888	179
155	2817441	2817626	186
156	2817958	2818066	109
157	2818391	2819959	1569
158	2820259	2820420	162
159	2820451	2820738	288
160	2820900	2821101	202
161	2821389	2821457	69
162	2821534	2821603	70
163	2821744	2822293	550
164	2823149	2823335	187
165	2824130	2824232	103
166	2824614	2824814	201
167	2824864	2824910	47
168	2825021	2825064	44
169	2825519	2825606	88
170	2825609	2825851	243
171	2826321	2827048	728
172	2827107	2827326	220
173	2827553	2827890	338
174	2827927	2828175	249
175	2828213	2828835	623
176	2828908	2829109	202
177	2829113	2830923	1811
178	2830966	2831940	975
179	2831976	2832201	226
180	2832241	2832540	300
181	2832699	2832813	115
182	2832990	2833183	194
183	2834750	2834805	56
184	2834895	2835013	119
185	2835469	2835614	146
186	2835894	2836034	141
187	2836222	2836355	134
188	2836642	2836817	176
189	2836887	2837099	213
190	2837888	2838911	1024
191	2838964	2839069	106
192	2839268	2839694	427
193	2839716	2839736	21
194	2839758	2839832	75
195	2840116	2840256	141
196	2840300	2840827	528
197	2840907	2841107	201
198	2841437	2842007	571
199	2842012	2842205	194
200	2842551	2842716	166
201	2843008	2843618	611
202	2844084	2844156	73
203	2844450	2844680	231
204	2844703	2844766	64
205	2844808	2844934	127
206	2845260	2845538	279
207	2845855	2846006	152
208	2846080	2846857	778
209	2846940	2847023	84
210	2847245	2847530	286
211	2847535	2847712	178
212	2847970	2849451	1482
213	2849508	2850497	990
214	2850520	2850857	338
215	2851174	2851389	216
216	2851495	2851744	250
217	2851775	2852081	307
218	2859719	2859807	89
219	2859864	2859972	109
220	2860286	2860418	133
221	2860562	2860762	201
222	2860770	2861262	493
223	2861560	2861584	25
224	2861636	2862091	456
225	2862167	2862378	212
226	2862625	2862725	101
227	2862760	2862897	138
228	2862905	2863043	139
229	2863046	2863181	136
230	2863198	2863313	116
231	2864465	2864653	189
232	2865263	2865443	181
233	2866984	2867434	451
234	2867548	2867717	170
235	2868014	2868115	102
236	2868146	2868309	164
237	2868368	2868517	150
238	2868568	2868690	123
239	2868787	2868831	45
240	2870142	2870476	335
241	2873165	2873366	202
242	2873603	2873804	202
243	2874493	2874540	48
244	2874600	2874818	219
245	2875229	2875429	201
246	2875486	2875686	201
247	2876005	2876206	202
248	2876332	2876632	301
249	2878103	2878236	134
250	2878323	2878953	631
251	2879383	2879587	205
252	2879937	2880429	493
253	2881782	2881983	202
254	2882253	2882453	201
255	2882737	2882788	52
256	2882837	2882915	79
257	2882917	2883066	150
258	2883553	2883647	95
259	2883653	2883754	102
260	2883771	2883942	172
261	2885082	2885198	117
262	2885930	2886768	839
263	2886807	2887223	417
264	2887394	2887534	141
265	2888070	2888579	510
266	2888903	2889566	664
267	2889570	2889972	403
268	2890283	2890484	202
269	2890559	2890757	199
270	2891924	2892124	201
271	2894427	2894542	116
272	2894617	2894892	276
273	2903123	2903204	82
274	2903553	2904166	614
275	2904323	2905192	870
276	2905513	2905849	337
277	2906130	2906382	253
278	2907331	2907363	33
279	2907388	2907461	74
280	2907493	2907592	100
281	2908237	2908427	191
282	2908816	2908922	107
283	2909065	2909234	170
284	2909276	2909550	275
285	2909845	2910156	312
286	6655517	6655717	201
287	6656131	6657564	1434
288	6657693	6658357	665
289	6658878	6659079	202
290	6659082	6659265	184
291	6660244	6660445	202
292	6660522	6661445	924
293	6661621	6662084	464
294	6662120	6662413	294
295	6662441	6662812	372
296	6662828	6662928	101
297	6666496	6666696	201
298	6666707	6666764	58
299	6666797	6666908	112
300	6667118	6667240	123
301	6667525	6667655	131
302	6667918	6668118	201
303	6668180	6668678	499
304	6669795	6669971	177
305	6670021	6670209	189
306	6670231	6670291	61
307	6670459	6670654	196
308	6670742	6671048	307
309	6671299	6671310	12
310	6671472	6671497	26
311	6671701	6671767	67
312	6671899	6672105	207
313	6672161	6672330	170
314	6672628	6672694	67
315	6672760	6672829	70
316	6672845	6672938	94
317	6673015	6673151	137
318	6673239	6673365	127
319	7540768	7540888	121
320	7541388	7541423	36
321	7541490	7541517	28
322	7541779	7541850	72
323	7541853	7541933	81
324	7541951	7542031	81
325	7542622	7542802	181
326	7542844	7543058	215
327	7543124	7543373	250
328	7543417	7543537	121
329	7543631	7543842	212
330	7543938	7544119	182
331	7544153	7544463	311
332	7544675	7544875	201
333	7544883	7545176	294
334	7545178	7545242	65
335	7545252	7545395	144
336	7545420	7545516	97
337	7545652	7545727	76
338	7545752	7546253	502
339	7546286	7547224	939
340	7547315	7547938	624
341	7547964	7548748	785
342	7548785	7548957	173
343	7549027	7549814	788
344	7551489	7551671	183
345	7552339	7552422	84
346	7552424	7552528	105
347	7552559	7552959	401
348	7553014	7553081	68
349	7553168	7553214	47
350	7553338	7553535	198
351	7553557	7554314	758
352	7554328	7554504	177
353	7554538	7554785	248
354	7554847	7555386	540
355	7555502	7555828	327
356	7555865	7556130	266
357	7556141	7556469	329
358	7556476	7557082	607
359	7557099	7557319	221
360	7557414	7558165	752
361	7558204	7559436	1233
362	7559439	7559679	241
363	7559734	7560119	386
364	7560129	7560346	218
365	7560494	7561384	891
366	7561611	7561771	161
367	7561789	7561852	64
368	7561894	7561943	50
369	7562306	7562595	290
370	7562646	7562796	151
371	7562946	7563323	378
372	7563349	7563432	84
373	7563436	7563536	101
374	7563543	7563666	124
375	7563856	7564025	170
376	7564614	7564737	124
377	7564749	7565379	631
378	7565439	7565772	334
379	7565783	7565901	119
380	7565949	7566225	277
381	7566356	7566582	227
382	7566584	7566771	188
383	7566833	7567047	215
384	7567212	7567415	204
385	7567451	7567594	144
386	7567632	7567753	122
387	7567779	7567847	69
388	7568242	7568660	419
389	7568955	7569046	92
390	7569199	7569372	174
391	7569403	7569482	80
392	7569638	7569836	199
393	7570005	7570084	80
394	7570130	7570297	168
395	7570323	7570390	68
396	7570405	7570596	192
397	7570609	7570745	137
398	7570783	7571041	259
399	7571089	7571162	74
400	7571233	7571672	440
401	7571860	7572075	216
402	7572100	7572745	646
403	7572783	7572850	68
404	7579267	7579395	129
405	7580331	7580531	201
406	7580641	7580761	121
407	7580765	7581214	450
408	7581246	7581522	277
409	7581529	7581823	295
410	7582147	7582350	204
411	7582383	7582477	95
412	7582848	7583118	271
413	7583188	7583252	65
414	7583590	7583687	98
415	7584102	7584303	202
416	7584315	7584515	201
417	7584726	7584927	202
418	7585159	7585996	838
419	7586464	7586812	349
420	7586834	7586992	159
421	7587022	7587564	543
422	7587853	7588268	416
423	7588303	7588352	50
424	7588431	7588606	176
425	7588756	7588818	63
426	7588830	7588941	112
427	7589020	7589397	378
428	7589429	7589519	91
429	7589527	7590203	677
430	7590231	7590590	360
431	7590681	7590851	171
432	7590856	7590939	84
433	7590986	7591061	76
434	7591068	7591168	101
435	7591290	7591872	583
436	7592168	7592378	211
437	7592397	7592588	192
438	7592637	7592830	194
439	7592858	7593344	487
440	7593366	7595162	1797
441	7595259	7595895	637
442	7596075	7596857	783
443	7596880	7596995	116
444	7597099	7597406	308
445	7597469	7598071	603
446	7598117	7599059	943
447	7599067	7599159	93
448	7599409	7599516	108
449	7599523	7599647	125
450	7599693	7599712	20
451	7599719	7599989	271
452	7600188	7600446	259
453	7600534	7600705	172
454	7600728	7601042	315
455	7601052	7601151	100
456	7601159	7601357	199
457	7601434	7601992	559
458	7602116	7602392	277
459	7602491	7602889	399
460	7602929	7602977	49
461	7603017	7603357	341
462	7603751	7604143	393
463	7604325	7604645	321
464	7604705	7604881	177
465	7604908	7604990	83
466	7605011	7605109	99
467	7605111	7605527	417
468	7605578	7605838	261
469	7606070	7607148	1079
470	7607390	7607800	411
471	7607869	7608419	551
472	7608574	7608816	243
473	7608848	7609041	194
474	7609074	7609166	93
475	7609328	7609461	134
476	7609463	7609737	275
477	7609765	7610343	579
478	7610385	7610641	257
479	7611053	7611254	202
480	7611455	7611605	151
481	7611674	7611762	89
482	7611769	7612133	365
483	7612163	7612638	476
484	7612783	7613369	587
485	7613462	7613793	332
486	7614162	7614277	116
487	7614404	7614604	201
488	7614723	7614895	173
489	7615090	7615137	48
490	7615436	7615501	66
491	7615560	7615636	77
492	7616001	7616201	201
493	7616236	7617466	1231
494	7617474	7617561	88
495	7617841	7618064	224
496	7618123	7618325	203
497	7618379	7618595	217
498	7618628	7618857	230
499	7618954	7619041	88
500	7619059	7619297	239
501	7619314	7619919	606
502	7619942	7620552	611
503	7622253	7622987	735
504	7623110	7623311	202
505	7624968	7625171	204
506	7625181	7625532	352
507	7625790	7626043	254
508	7626512	7627280	769
509	7627352	7627661	310
510	7627952	7628424	473
511	7628457	7628562	106
512	7628567	7628873	307
513	7629078	7629606	529
514	7633385	7634315	931
515	7634397	7634597	201
516	7634658	7634786	129
517	7634803	7634877	75
518	7635260	7635687	428
519	7636016	7636136	121
520	7636139	7636339	201
521	7636416	7636617	202
522	7636681	7637793	1113
523	7637806	7637932	127
524	7637966	7638892	927
525	7639251	7639599	349
526	7639651	7639743	93
527	7640009	7640722	714
528	7641194	7641381	188
529	7641384	7641708	325
530	7641815	7641877	63
531	7641945	7642016	72
532	7642126	7642536	411
533	7642716	7642882	167
534	7643150	7643223	74
535	7643349	7643507	159
536	7643631	7643815	185
537	7643846	7644951	1106
538	7645561	7645637	77
539	7645680	7645963	284
540	7645985	7646170	186
541	7646211	7646297	87
542	7646606	7646706	101
543	7646720	7646847	128
544	7646976	7647155	180
545	7647234	7647383	150
546	7647475	7647785	311
547	7648120	7648321	202
548	7648366	7648643	278
549	7648667	7648857	191
550	7649108	7649173	66
551	7649456	7649660	205
552	7649934	7650017	84
553	7650391	7650564	174
554	7650911	7651112	202
555	7651567	7651945	379
556	7651967	7652155	189
557	7652441	7652613	173
558	7652666	7652972	307
559	7652981	7653232	252
560	7653360	7653366	7
561	7653406	7653427	22
562	7653475	7653855	381
563	7653895	7654156	262
564	7654326	7654498	173
565	7654688	7654918	231
566	7654948	7655179	232
567	7655282	7656034	753
568	7656226	7656427	202
569	7657368	7657651	284
570	7657685	7657954	270
571	7657958	7658113	156
572	7658124	7658289	166
573	7659042	7659771	730
574	7659782	7659838	57
575	7659962	7660022	61
576	7660047	7660162	116
577	7660484	7660896	413
578	7660947	7661361	415
579	7661372	7661624	253
580	7661632	7661767	136
581	7661772	7661911	140
582	7661946	7662065	120
583	7662372	7662498	127
584	7662594	7662739	146
585	7662917	7662970	54
586	7663015	7663073	59
587	7663107	7663261	155
588	7663787	7663971	185
589	7663981	7664090	110
590	7664181	7664420	240
591	7664866	7665013	148
592	7665018	7665059	42
593	7665287	7665778	492
594	7665798	7665989	192
595	7666012	7666177	166
596	7666259	7666689	431
597	7666713	7666876	164
598	7666902	7667006	105
599	7667069	7667613	545
600	7667829	7668030	202
601	7668421	7668726	306
602	7670049	7670200	152
603	7670477	7670581	105
604	7670658	7670724	67
605	7670781	7671051	271
606	7671073	7671292	220
607	7671363	7671720	358
608	7671760	7671816	57
609	7672459	7672659	201
610	7672805	7673006	202
611	7673199	7673406	208
612	7674076	7674277	202
613	7674346	7674547	202
614	7675215	7675415	201
615	7675608	7675966	359
616	7676528	7676728	201
617	7676879	7677079	201
618	7678453	7678654	202
619	7680044	7680245	202
620	7680327	7680510	184
621	7680843	7681044	202
622	7681219	7681420	202
623	7681957	7682054	98
624	7683523	7683724	202
625	7684324	7684524	201
626	7685157	7685358	202
627	7685406	7685607	202
628	7685903	7686103	201
629	7687718	7687919	202
630	7688106	7688307	202
631	7688463	7688663	201
632	7688960	7689160	201
633	7689708	7689908	201
634	7690091	7690292	202
635	7690499	7690699	201
636	7691355	7691669	315
637	7692504	7692705	202
638	7693212	7693408	197
639	7693928	7694129	202
640	7694929	7695646	718
641	7696118	7697176	1059
642	7697223	7697666	444
643	7697675	7698177	503
644	7698232	7698489	258
645	7698498	7698853	356
646	7698868	7698987	120
647	7709074	7709156	83
648	7709166	7709262	97
649	7713538	7713805	268
650	7713844	7713922	79
651	7714213	7714565	353
652	7714583	7714983	401
653	7715392	7716347	956
654	7716371	7716477	107
655	7716521	7716627	107
656	7721671	7721829	159
657	7721885	7722130	246
658	7722368	7722925	558
659	7723084	7723487	404
660	7724212	7724368	157
661	7724441	7724507	67
662	7724536	7724578	43
663	7724672	7724805	134
664	7724921	7725108	188
665	7725574	7725722	149
666	7725929	7726115	187
667	7726623	7726804	182
668	7727714	7727901	188
669	7728579	7728794	216
670	7729359	7729804	446
671	7730160	7730294	135
672	7730708	7730818	111
673	7731026	7731226	201
674	7731652	7731853	202
675	7735191	7735311	121
676	7735365	7735509	145
677	7735710	7735910	201
678	7735931	7736288	358
679	7736478	7736767	290
680	7737394	7737595	202
681	7738500	7738700	201
682	7739236	7739437	202
683	7739507	7739708	202
684	7739888	7740089	202
685	7740371	7740571	201
686	7741110	7741494	385
687	7741545	7741745	201
688	7741903	7741991	89
689	7742017	7742103	87
690	7742344	7742544	201
691	7743100	7743300	201
692	7743658	7743859	202
693	7744268	7744469	202
694	7744711	7744912	202
695	7745067	7745267	201
696	7745874	7746256	383
697	7746527	7746736	210
698	7747585	7747791	207
699	7748029	7748064	36
700	7748169	7748230	62
701	7748286	7748487	202
702	7748513	7748713	201
703	7749287	7749441	155
704	7749447	7749487	41
705	7749586	7749787	202
706	7750024	7750224	201
707	7750449	7750599	151
708	7750864	7750985	122
709	7751498	7751835	338
710	7752170	7752371	202
711	7752800	7752934	135
712	7753835	7754161	327
713	7756576	7756777	202
714	7760584	7760784	201
715	7761448	7761520	73
716	7761981	7762078	98
717	7762131	7762192	62
718	7762196	7762594	399
719	7766950	7766977	28
720	7767085	7767151	67
721	7767397	7767728	332
722	7767969	7768169	201
723	7768261	7768376	116
724	7768469	7768525	57
725	7768696	7768718	23
726	7768843	7769048	206
727	7769101	7769253	153
728	7769529	7770411	883
729	7770894	7771346	453
730	7771358	7771504	147
731	7771544	7772742	1199
732	7772802	7773172	371
733	7773259	7773661	403
734	7773715	7774021	307
735	7775130	7775322	193
736	7775371	7775491	121
737	7775540	7775632	93
738	7775670	7776156	487
739	7776185	7776339	155
740	7776369	7776471	103
741	7776507	7776650	144
742	7776655	7776988	334
743	7777261	7777399	139
744	7779776	7779976	201
745	7781348	7781616	269
746	7781660	7782254	595
747	7782393	7782730	338
748	7783082	7783239	158
749	7783262	7783355	94
750	7783401	7783425	25
751	7783502	7783634	133
752	7783783	7783979	197
753	7784342	7784387	46
754	7784743	7784839	97
755	7784964	7785036	73
756	7785109	7785164	56
757	7785299	7785499	201
758	7786667	7786868	202
759	7787270	7787444	175
760	7788010	7788411	402
761	7788934	7789134	201
762	7789193	7789394	202
763	7790123	7790323	201
764	7790786	7790987	202
765	7790990	7791190	201
766	7791846	7792046	201
767	7792165	7792562	398
768	7792742	7793130	389
769	7793711	7793980	270
770	7794031	7794133	103
771	7795819	7796006	188
772	7796867	7797021	155
773	7797510	7797792	283
774	7797815	7797909	95
775	7798202	7798403	202
776	7798747	7798947	201
777	7799321	7799522	202
778	7799765	7799937	173
779	7799975	7800128	154
780	7800148	7800443	296
781	7801047	7801172	126
782	7801242	7801443	202
783	7801748	7801948	201
784	7802176	7802377	202
785	7802864	7802935	72
786	7802968	7803241	274
787	7803557	7803655	99
788	7803677	7803758	82
789	7803913	7804114	202
790	7804723	7804923	201
791	7805188	7805504	317
792	7805516	7805717	202
793	7806312	7806449	138
794	7806467	7806855	389
795	7807274	7807474	201
796	7808000	7808201	202
797	7808343	7808544	202
798	7808898	7809098	201
799	7809604	7809805	202
800	7810367	7810680	314
801	7811421	7811564	144
802	7811616	7811695	80
803	7812105	7812306	202
804	7812567	7812767	201
805	7813383	7813500	118
806	7813502	7813584	83
807	7814263	7814463	201
808	7814679	7814706	28
809	7814736	7814880	145
810	7815128	7815528	401
811	7815747	7815948	202
812	7816574	7816774	201
813	7816862	7817001	140
814	7817255	7817455	201
815	7817610	7817732	123
816	7817749	7817811	63
817	7818345	7818493	149
818	7818506	7818546	41
819	7819197	7819398	202
820	7819507	7819708	202
821	7820002	7820203	202
822	7820439	7820635	197
823	7829868	7829973	106
824	7830588	7830742	155
825	7831731	7831931	201
826	7831951	7832071	121
827	7832551	7832678	128
828	7832714	7832751	38
829	7833015	7833181	167
830	7833807	7834007	201
831	7834073	7834274	202
832	7834756	7835102	347
833	7835324	7835382	59
834	7835384	7835522	139
835	7836092	7836185	94
836	7836880	7837195	316
837	7837818	7838004	187
838	7838696	7838897	202
839	7838967	7839168	202
840	7840323	7840371	49
841	7840374	7840450	77
842	7840455	7840523	69
843	7840820	7841173	354
844	7841698	7841899	202
845	7842447	7842648	202
846	7843572	7843773	202
847	7844450	7844650	201
848	7844738	7844938	201
849	7845221	7845358	138
850	7845360	7845422	63
851	7845465	7845665	201
852	7846425	7846625	201
853	7847081	7847459	379
854	7848279	7848480	202
855	7848596	7848796	201
856	7851212	7851283	72
857	7851311	7851591	281
858	7851708	7852459	752
859	7852473	7852541	69
860	7852564	7852626	63
861	7852649	7853141	493
862	7853376	7853973	598
863	7854009	7854550	542
864	7854582	7854692	111
865	7858864	7859891	1028
866	7865676	7865825	150
867	7866865	7867580	716
868	7867789	7867861	73
869	7868250	7868753	504
870	7868951	7868980	30
871	7868986	7869131	146
872	7869911	7869983	73
873	7869990	7870112	123
874	7870254	7870430	177
875	7870464	7870540	77
876	7870554	7870638	85
877	7870667	7870836	170
878	7870926	7871126	201
879	7871596	7871721	126
880	7871735	7871797	63
881	7873194	7873320	127
882	7874114	7874190	77
883	7874521	7874717	197
884	7875227	7875427	201
885	7875481	7875682	202
886	7875974	7876174	201
887	7876219	7876419	201
888	7876612	7876813	202
889	7877145	7877346	202
890	7877470	7877670	201
891	7877746	7877833	88
892	7877849	7877947	99
893	7878581	7878806	226
894	7879405	7879606	202
895	7880903	7881104	202
896	7881765	7881966	202
897	7882216	7882416	201
898	7882656	7882856	201
899	7883019	7883219	201
900	7883517	7883700	184
901	7884574	7884775	202
902	7884947	7885148	202
903	7886492	7886613	122
904	7886968	7887152	185
905	7887470	7887561	92
906	7887615	7887816	202
907	7888658	7888859	202
908	7889340	7889408	69
909	7889410	7889720	311
910	7890670	7890871	202
911	7891261	7891396	136
912	7891456	7891569	114
913	7891628	7891766	139
914	7892287	7892493	207
915	7892601	7892787	187
916	7893360	7893547	188
917	7893553	7893729	177
918	7894087	7894288	202
919	7894308	7894560	253
920	7899492	7899528	37
921	7899548	7899692	145
922	7899755	7899936	182
923	7900783	7900984	202
924	7901632	7901832	201
925	7902197	7902397	201
926	7902527	7902727	201
927	7903645	7903658	14
928	7903721	7903723	3
929	7903730	7903922	193
930	7903968	7904060	93
931	7904099	7904169	71
932	7904546	7904800	255
933	7905062	7905138	77
934	7905397	7905444	48
935	7907302	7907605	304
936	7907624	7907627	4
937	7907717	7907907	191
938	7908138	7908339	202
939	7909132	7909325	194
940	7909856	7910057	202
941	7910303	7910504	202
942	7910719	7910811	93
943	7910818	7910919	102
944	7911812	7912013	202
945	7912036	7912092	57
946	7912136	7912236	101
947	7912340	7912540	201
948	7912717	7912912	196
949	7913139	7913300	162
950	7913586	7913658	73
951	7913667	7913748	82
952	7913766	7913787	22
953	7913855	7914056	202
954	7914650	7914847	198
955	7915455	7915639	185
956	7916562	7916763	202
957	7918980	7919133	154
958	7919140	7919181	42
959	7919208	7919409	202
960	7919585	7919694	110
961	7919725	7919765	41
962	7921257	7921444	188
963	7921570	7921673	104
964	7922550	7922730	181
965	7923188	7923389	202
966	7923420	7923430	11
967	7923440	7923530	91
968	7925391	7925458	68
969	7925514	7925842	329
970	7926156	7926356	201
971	7927577	7927761	185
972	7927899	7928060	162
973	7928691	7928727	37
974	7928734	7928891	158
975	7929493	7929693	201
976	7929733	7929934	202
977	7930678	7930854	177
978	7931992	7932329	338
979	7932367	7932440	74
980	7932993	7933187	195
981	7933849	7934036	188
982	7934874	7935075	202
983	7935372	7935573	202
984	7936050	7936251	202
985	7936706	7937273	568
986	7937322	7937597	276
987	7937601	7937815	215
988	7937851	7937952	102
989	7938065	7938168	104
990	7938171	7938656	486
991	7938994	7939163	170
992	7939553	7939837	285
993	7940727	7940768	42
994	7941097	7941227	131
995	7941966	7942167	202
996	7942334	7942535	202
997	7943626	7943742	117
998	7943769	7943826	58
999	7943958	7944158	201
1000	7944331	7944532	202
1001	7945029	7945341	313
1002	7946953	7947058	106
1003	7947341	7947471	131
1004	7947648	7947731	84
1005	7948647	7948729	83
1006	7948777	7948843	67
1007	7949513	7949713	201
1008	7950379	7950580	202
1009	7951235	7951436	202
1010	7952106	7952307	202
1011	7952990	7953191	202
1012	7953245	7953372	128
1013	7953383	7953445	63
1014	7953711	7954005	295
1015	7954106	7954307	202
1016	7954508	7954698	191
1017	7955016	7955217	202
1018	7955369	7955569	201
1019	7955867	7956067	201
1020	7956290	7956491	202
1021	7957159	7957360	202
1022	7958309	7958419	111
1023	7958663	7958814	152
1024	7959016	7959135	120
1025	7959336	7959407	72
1026	7959414	7959704	291
1027	7960635	7960743	109
1028	7960746	7960836	91
1029	7961057	7961257	201
1030	7961510	7961705	196
1031	7962380	7962473	94
1032	7962516	7962557	42
1033	7962566	7962767	202
1034	7962903	7963058	156
1035	7964153	7964353	201
1036	7964374	7964468	95
1037	7970548	7970719	172
1038	7971517	7971614	98
1039	7971647	7971717	71
1040	7972020	7972220	201
1041	7972407	7972543	137
1042	7972564	7972765	202
1043	7973182	7973382	201
1044	7974379	7974546	168
1045	7975274	7975354	81
1046	7975419	7975818	400
1047	7975869	7975943	75
1048	7975964	7976159	196
1049	7976189	7976380	192
1050	7978642	7978766	125
1051	7978909	7978978	70
1052	7979044	7979135	92
1053	7980586	7980647	62
1054	7981472	7981673	202
1055	7981829	7981860	32
1056	7981905	7981974	70
1057	7982510	7982672	163
1058	7982980	7983070	91
1059	7983358	7983449	92
1060	7983589	7983722	134
1061	7983725	7983786	62
1062	7983900	7984040	141
1063	7984062	7984376	315
1064	7986122	7986488	367
1065	7986556	7987007	452
1066	7987063	7987757	695
1067	7987778	7988078	301
1068	7988108	7988670	563
1069	7988681	7988891	211
1070	7988904	7989038	135
1071	7989098	7989248	151
1072	7989394	7989450	57
1073	7989467	7989506	40
1074	7989530	7989655	126
1075	7989744	7989768	25
1076	7989824	7989943	120
1077	7990465	7990472	8
1078	7990502	7990556	55
1079	7994810	7994845	36
1080	7994874	7994995	122
1081	7995005	7995286	282
1082	7995402	7995504	103
1083	7995524	7995729	206
1084	7997122	7997196	75
1085	7997202	7997375	174
1086	7997423	7998379	957
1087	7998422	7998674	253
1088	7998880	7999999	1120
1089	8000066	8000350	285
1090	8000376	8000398	23
1091	8000462	8000462	1
1092	8000543	8000703	161
1093	8000752	8000841	90
1094	8000882	8001029	148
1095	8001046	8001264	219
1096	8001531	8001845	315
1097	8002178	8002336	159
1098	8008408	8008652	245
1099	8008903	8009057	155
1100	8009086	8009218	133
1101	8009228	8009331	104
1102	8009453	8009619	167
1103	8009628	8009802	175
1104	8009853	8009935	83
1105	8009963	8010049	87
1106	8010290	8010376	87
1107	8010655	8010794	140
1108	8011181	8011206	26
1109	8011251	8011524	274
1110	8011738	8011793	56
1111	8011830	8012245	416
1112	8012415	8012471	57
1113	8012538	8012616	79
1114	8012686	8012896	211
1115	8013005	8013265	261
1116	8013663	8013918	256
1117	8014009	8014103	95
1118	8014404	8014668	265
1119	8015195	8015241	47
1120	8015248	8015338	91
1121	8015545	8015585	41
1122	8015721	8015830	110
1123	8016782	8016899	118
1124	8017293	8017404	112
1125	8018277	8018344	68
1126	8018416	8018558	143
1127	8018590	8018765	176
1128	8019011	8019152	142
1129	8019162	8019415	254
1130	8019446	8019522	77
1131	8019718	8019807	90
1132	8019856	8020002	147
1133	8020083	8020220	138
1134	8020315	8020450	136
1135	8020454	8020526	73
1136	8020548	8020664	117
1137	8020695	8020739	45
1138	8020826	8021129	304
1139	8021331	8021497	167
1140	8022972	8023078	107
1141	8023660	8023713	54
1142	8023715	8023860	146
1143	8024594	8024880	287
1144	8025235	8025368	134
1145	8025963	8025991	29
1146	8026067	8026281	215
1147	8026340	8026421	82
1148	8026448	8026533	86
1149	8026814	8026885	72
1150	8027071	8027303	233
1151	8027331	8027475	145
1152	8027480	8027588	109
1153	8028040	8028225	186
1154	8028472	8028546	75
1155	8028594	8028924	331
1156	8028946	8029140	195
1157	8029144	8029336	193
1158	8029362	8029824	463
1159	8029899	8029904	6
1160	8030005	8030029	25
1161	8030060	8030417	358
1162	8030440	8030632	193
1163	8030649	8030865	217
1164	8030875	8030959	85
1165	8031012	8031063	52
1166	8031067	8031193	127
1167	8031195	8031212	18
1168	8031285	8031517	233
1169	8031540	8031652	113
1170	8032095	8032173	79
1171	8032353	8032512	160
1172	8032566	8032645	80
1173	8032986	8033058	73
1174	8033148	8033266	119
1175	8033385	8033507	123
1176	8033575	8033781	207
1177	8033790	8033963	174
1178	8033993	8034049	57
1179	8034404	8034506	103
1180	8034529	8034579	51
1181	8034591	8034958	368
1182	8034961	8035580	620
1183	8035688	8035745	58
1184	8035760	8035919	160
1185	8036321	8036494	174
1186	8036671	8036795	125
1187	8037019	8037031	13
1188	8037108	8037362	255
1189	8037753	8038125	373
1190	8038127	8038585	459
1191	8038666	8038858	193
1192	8038986	8039115	130
1193	8039220	8039299	80
1194	8039483	8039676	194
1195	8039736	8039746	11
1196	8039824	8040025	202
1197	8040316	8040660	345
1198	8040687	8040792	106
1199	8041126	8041317	192
1200	8041750	8041951	202
1201	8045602	8045646	45
1202	8045659	8045721	63
1203	8045906	8046392	487
1204	8046418	8046820	403
1205	8046878	8047172	295
1206	8049566	8049658	93
1207	8049664	8049796	133
1208	8049889	8049910	22
1209	8049946	8050190	245
1210	8050605	8051060	456
1211	8051120	8051246	127
1212	8051273	8051425	153
1213	8051480	8051566	87
1214	8051604	8051706	103
1215	8052672	8052745	74
1216	8052747	8052891	145
1217	8052923	8052995	73
1218	8053105	8053323	219
1219	8053615	8053690	76
1220	8053693	8053773	81
1221	8053793	8053878	86
1222	8053885	8053968	84
1223	8053990	8054138	149
1224	8054180	8054359	180
1225	8054370	8054514	145
1226	8054520	8054610	91
1227	8054635	8054692	58
1228	8054714	8054815	102
1229	8054830	8054917	88
1230	8054976	8055074	99
1231	8055259	8055404	146
1232	8055449	8055488	40
1233	8055519	8055765	247
1234	8058740	8058909	170
1235	8059025	8059219	195
1236	8059226	8059497	272
1237	8059509	8059595	87
1238	8059621	8059716	96
1239	8059763	8059839	77
1240	8059851	8059936	86
1241	8060268	8060453	186
1242	8060829	8060991	163
1243	8061008	8061092	85
1244	8061265	8061413	149
1245	8061440	8061506	67
1246	8067611	8067761	151
1247	8068148	8068349	202
1248	8068365	8068566	202
1249	8068700	8069046	347
1250	8072739	8072843	105
1251	8080622	8080702	81
1252	8080857	8081226	370
1253	8081234	8081632	399
1254	8081688	8081876	189
1255	8081962	8082067	106
1256	8082091	8082182	92
1257	8082233	8082447	215
1258	8082472	8082598	127
1259	8082629	8082667	39
1260	8082697	8082897	201
1261	8083093	8083655	563
1262	8083664	8083732	69
1263	8083835	8084083	249
1264	8084116	8084212	97
1265	8084547	8084889	343
1266	8084912	8085049	138
1267	8085067	8085156	90
1268	8085817	8085902	86
1269	8085904	8086237	334
1270	8086301	8086514	214
1271	8086520	8086679	160
1272	8086886	8087704	819
1273	8087757	8087856	100
1274	8087884	8088005	122
1275	8088097	8088179	83
1276	8088182	8088216	35
1277	8088252	8088311	60
1278	8088362	8088451	90
1279	8088605	8088841	237
1280	8088877	8089084	208
1281	8089314	8089491	178
1282	8089556	8089675	120
1283	8089683	8089827	145
1284	8089981	8090147	167
1285	8090194	8090372	179
1286	8090492	8090640	149
1287	8092341	8092524	184
1288	8092841	8092879	39
1289	8092987	8093160	174
1290	8093588	8093717	130
1291	8094253	8094315	63
1292	8094947	8095079	133
1293	8095089	8095173	85
1294	8095845	8095982	138
1295	8096135	8096331	197
1296	8097138	8097339	202
1297	8097581	8097691	111
1298	8097746	8097871	126
1299	8098105	8098716	612
1300	8098720	8098887	168
1301	8098969	8099073	105
1302	8099128	8099346	219
1303	8099370	8099545	176
1304	8099570	8099745	176
1305	8099788	8099849	62
1306	8100155	8100203	49
1307	8100215	8100293	79
1308	8100675	8100771	97
1309	8100916	8100986	71
1310	8101036	8101113	78
1311	8101204	8101406	203
1312	8101510	8101578	69
1313	8101831	8101964	134
1314	8102397	8102482	86
1315	8102814	8102926	113
1316	8104059	8104271	213
1317	8104335	8104372	38
1318	8104551	8104591	41
1319	8104812	8104954	143
1320	8105973	8106093	121
1321	8106203	8106291	89
1322	8106340	8106420	81
1323	8106488	8106870	383
1324	8106903	8107084	182
1325	8107102	8107196	95
1326	8107267	8107401	135
1327	8107403	8107503	101
1328	8107508	8107621	114
1329	8107632	8107798	167
1330	8107827	8108030	204
1331	8108453	8108575	123
1332	8108643	8108729	87
1333	8109391	8109532	142
1334	8109565	8109592	28
1335	8109636	8109655	20
1336	8109683	8109742	60
1337	8110137	8110465	329
1338	8112734	8112815	82
1339	8112989	8113111	123
1340	8113229	8113356	128
1341	8114230	8114290	61
1342	8114478	8114567	90
1343	8114603	8114689	87
1344	8114769	8114959	191
1345	8114991	8115084	94
1346	8115174	8115254	81
1347	8115296	8115302	7
1348	8115305	8115373	69
1349	8115646	8115723	78
1350	8115731	8115804	74
1351	8116037	8116142	106
1352	8116187	8116332	146
1353	8116337	8116551	215
1354	8116561	8116667	107
1355	8116757	8116933	177
1356	8117017	8117200	184
1357	8117252	8117334	83
1358	8117432	8117515	84
1359	8117539	8117772	234
1360	8117833	8117902	70
1361	8117927	8118024	98
1362	8118121	8118479	359
1363	8118488	8118506	19
1364	8118572	8118738	167
1365	8118742	8118964	223
1366	8118970	8119061	92
1367	8119499	8119569	71
1368	8119574	8120382	809
1369	8120419	8120659	241
1370	8120683	8120985	303
1371	8121024	8121975	952
1372	8121979	8122072	94
1373	8122099	8122270	172
1374	8122314	8122626	313
1375	8122650	8122819	170
1376	8122827	8123042	216
1377	8123144	8123226	83
1378	8123304	8123649	346
1379	8123734	8124107	374
1380	8124144	8124215	72
1381	8124836	8124859	24
1382	8125176	8125265	90
1383	8125350	8125426	77
1384	8125526	8125677	152
1385	8125924	8126175	252
1386	8126436	8126553	118
1387	8126644	8126767	124
1388	8126800	8127157	358
1389	8127661	8127763	103
1390	8128135	8128340	206
1391	8128843	8128986	144
1392	8129738	8129824	87
1393	8129860	8129920	61
1394	8129992	8130132	141
1395	8130855	8130901	47
1396	8130960	8131257	298
1397	8131265	8131340	76
1398	8131758	8131973	216
1399	8132117	8132226	110
1400	8132254	8132436	183
1401	8132443	8132532	90
1402	8132677	8133053	377
1403	8133127	8133244	118
1404	8133262	8133370	109
1405	8133419	8133518	100
1406	8133878	8134078	201
1407	8134312	8134710	399
1408	8134843	8134990	148
1409	8135068	8135330	263
1410	8138350	8138495	146
1411	8138523	8138636	114
1412	8138971	8139297	327
1413	8139308	8139492	185
1414	8139509	8139589	81
1415	8139651	8139761	111
1416	8139793	8140318	526
1417	8140676	8140749	74
1418	8140786	8140972	187
1419	8141017	8141081	65
1420	8141145	8141226	82
1421	8141277	8141343	67
1422	8141586	8142253	668
1423	8142301	8142440	140
1424	8142476	8142657	182
1425	8142987	8143148	162
1426	8143232	8143435	204
1427	8143853	8143978	126
1428	8144008	8144121	114
1429	8144135	8144596	462
1430	8144623	8144815	193
1431	8144863	8145024	162
1432	8145059	8145066	8
1433	8145104	8145172	69
1434	8145326	8145504	179
1435	8145540	8145673	134
1436	8145832	8145868	37
1437	8145915	8146253	339
1438	8146423	8146423	1
1439	8146427	8147418	992
1440	8147436	8147527	92
1441	8147544	8149672	2129
1442	8149677	8149798	122
1443	8149807	8150223	417
1444	8150512	8150978	467
1445	8150992	8151401	410
1446	8151746	8151831	86
1447	8151865	8152063	199
1448	8152101	8152173	73
1449	8152211	8152769	559
1450	8152811	8153207	397
1451	8153236	8153313	78
1452	8153340	8153503	164
1453	8154488	8154773	286
1454	8154810	8155019	210
1455	8155033	8155120	88
1456	8155913	8156086	174
1457	8156131	8156256	126
1458	8156618	8156861	244
1459	8156863	8156912	50
1460	8157177	8157388	212
1461	8157776	8158149	374
1462	8158172	8158343	172
1463	8158547	8158576	30
1464	8158632	8158748	117
1465	8159795	8160183	389
1466	8160398	8160598	201
1467	8161270	8161506	237
1468	8161534	8161918	385
1469	8162167	8162257	91
1470	8162259	8162342	84
1471	8162518	8162559	42
1472	8162563	8162719	157
1473	8163423	8163584	162
1474	8163923	8164022	100
1475	8165444	8165540	97
1476	8165599	8165677	79
1477	8165839	8165924	86
1478	8166065	8166265	201
1479	8166284	8166405	122
1480	8166419	8166484	66
1481	8168404	8168476	73
1482	8168486	8168562	77
1483	8169056	8169229	174
1484	8169618	8169773	156
1485	8169782	8170059	278
1486	8170191	8170332	142
1487	8170586	8170939	354
1488	8170986	8171277	292
1489	8171301	8171458	158
1490	8172297	8172432	136
1491	8173000	8173020	21
1492	8173057	8173083	27
1493	8173114	8173548	435
1494	8173601	8173744	144
1495	8179189	8179374	186
1496	8179379	8179576	198
1497	8180138	8180363	226
1498	8180367	8180426	60
1499	8181063	8181175	113
1500	8181580	8181717	138
1501	8181920	8182112	193
1502	8182352	8182552	201
1503	8182803	8182851	49
1504	8182856	8183003	148
1505	8183487	8183854	368
1506	8183993	8184044	52
1507	8184058	8184181	124
1508	8184362	8184555	194
1509	8184780	8184876	97
1510	8185534	8185734	201
1511	8185771	8185935	165
1512	8186660	8186860	201
1513	8187082	8187448	367
1514	8187982	8188193	212
1515	8188206	8188368	163
1516	8188479	8188671	193
1517	8188876	8189077	202
1518	8189140	8189262	123
1519	8189270	8189481	212
1520	8189713	8189880	168
1521	8190535	8190736	202
1522	8190868	8191039	172
1523	8191351	8191551	201
1524	8191719	8191920	202
1525	8192543	8192743	201
1526	8193512	8193712	201
1527	8193957	8194082	126
1528	8194092	8194157	66
1529	8194162	8194363	202
1530	8194462	8194663	202
1531	8194728	8195014	287
1532	8195209	8195410	202
1533	8195457	8195479	23
1534	8195497	8195836	340
1535	8196365	8196566	202
1536	8197096	8197296	201
1537	8198851	8199051	201
1538	8199336	8199536	201
1539	8199690	8199890	201
1540	8200011	8200211	201
1541	8200786	8201159	374
1542	8201689	8201889	201
1543	8202135	8202246	112
1544	8202911	8203112	202
1545	8203152	8203198	47
1546	8203207	8203353	147
1547	8204044	8204245	202
1548	8204400	8204589	190
1549	8204780	8204938	159
1550	8206416	8206470	55
1551	8206536	8206616	81
1552	8207691	8207830	140
1553	8208065	8208216	152
1554	8208845	8209045	201
1555	8209124	8209324	201
1556	8209678	8209720	43
1557	8209722	8209879	158
1558	8209957	8210155	199
1559	8210683	8210731	49
1560	8210733	8210871	139
1561	8211578	8211649	72
1562	8211718	8211778	61
1563	8212734	8213095	362
1564	8214580	8214695	116
1565	8214729	8214778	50
1566	8214829	8214869	41
1567	8215149	8215425	277
1568	8215540	8215739	200
1569	8215855	8215998	144
1570	8216156	8216294	139
1571	8217096	8217136	41
1572	8217494	8217982	489
1573	8218457	8218857	401
1574	8218867	8219266	400
1575	8219296	8219398	103
1576	8219758	8220141	384
1577	8220182	8220420	239
1578	8220887	8221021	135
1579	8221518	8221718	201
1580	8223114	8223314	201
1581	8223774	8223975	202
1582	8224396	8224597	202
1583	8224945	8225145	201
1584	8225363	8225556	194
1585	8225705	8225905	201
1586	8226000	8226275	276
1587	8226317	8226417	101
1588	8226649	8226849	201
1589	8226892	8227092	201
1590	8227785	8227985	201
1591	8228921	8229026	106
1592	8229397	8229597	201
1593	8229668	8229899	232
1594	8229979	8230127	149
1595	8230550	8230750	201
1596	8231037	8231237	201
1597	8231547	8231829	283
1598	8231852	8232047	196
1599	8232056	8232140	85
1600	8232177	8233139	963
1601	8233177	8233324	148
1602	8233367	8235236	1870
1603	8237565	8237839	275
1604	8237850	8239098	1249
1605	8239114	8239470	357
1606	8239519	8239626	108
1607	8239705	8240111	407
1608	8240236	8240771	536
1609	8241172	8241373	202
1610	8241536	8241736	201
1611	8241958	8242159	202
1612	8242205	8242405	201
1613	8243135	8243335	201
1614	8243521	8243722	202
1615	8244752	8244953	202
1616	8245023	8245224	202
1617	8245536	8245737	202
1618	8246662	8246822	161
1619	8247031	8247231	201
1620	8247530	8247731	202
1621	8247807	8248008	202
1622	8248315	8248373	59
1623	8248418	8248515	98
1624	8248536	8248736	201
1625	8249028	8249228	201
1626	8249447	8249648	202
1627	8250201	8250402	202
1628	8251308	8251503	196
1629	8252002	8252202	201
1630	8252207	8252407	201
1631	8252980	8253181	202
1632	8253274	8253474	201
1633	8254473	8254669	197
1634	8255410	8255797	388
1635	8256084	8256119	36
1636	8256354	8256554	201
1637	8257237	8257592	356
1638	8258346	8258546	201
1639	8258740	8258941	202
1640	8259474	8259675	202
1641	8259948	8260130	183
1642	8260791	8260911	121
1643	8261195	8261195	1
1644	8261229	8261311	83
1645	8261523	8261724	202
1646	8261877	8262077	201
1647	8262199	8262572	374
1648	8263530	8263602	73
1649	8263676	8263731	56
1650	8263883	8264083	201
1651	8264203	8264480	278
1652	8265082	8265165	84
1653	8265200	8265282	83
1654	8265617	8266019	403
1655	8266853	8267053	201
1656	8267428	8267629	202
1657	8267946	8268096	151
1658	8268130	8268305	176
1659	8268985	8269123	139
1660	8272144	8272345	202
1661	8272577	8272778	202
1662	8272801	8272963	163
1663	8273141	8273298	158
1664	8273446	8273614	169
1665	8274087	8274487	401
1666	8274592	8274668	77
1667	8274734	8275202	469
1668	8275208	8275326	119
1669	8275363	8275625	263
1670	8275891	8275968	78
1671	8280093	8280229	137
1672	8280241	8280261	21
1673	8280296	8280855	560
1674	8280885	8281416	532
1675	8281425	8281497	73
1676	8281811	8283101	1291
1677	8283134	8283761	628
1678	8284027	8284172	146
1679	8285704	8285904	201
1680	8286090	8286291	202
1681	8286777	8287140	364
1682	8287365	8288079	715
1683	8288082	8288309	228
1684	8288367	8288534	168
1685	8288863	8288958	96
1686	8288970	8289367	398
1687	8289550	8289707	158
1688	8290105	8290354	250
1689	8291170	8291321	152
1690	8291435	8291588	154
1691	8291590	8291630	41
1692	8292479	8292664	186
1693	8294815	8294851	37
1694	8294933	8295016	84
1695	8295084	8295285	202
1696	8296994	8297393	400
1697	8297884	8298082	199
1698	8298120	8298311	192
1699	8298493	8298694	202
1700	8298931	8299014	84
1701	8299017	8299107	91
1702	8299261	8299655	395
1703	8299816	8300016	201
1704	8300166	8300566	401
1705	8300599	8300605	7
1706	8300619	8300799	181
1707	8301447	8301648	202
1708	8301814	8302014	201
1709	8302101	8302499	399
1710	8303069	8303270	202
1711	8303376	8303535	160
1712	8304217	8304248	32
1713	8304276	8304417	142
1714	8305072	8305272	201
1715	8306246	8306446	201
1716	8306699	8306884	186
1717	8306989	8307279	291
1718	8307343	8307525	183
1719	8307874	8308074	201
1720	8308374	8308574	201
1721	8308687	8308887	201
1722	8309026	8309181	156
1723	8309422	8309498	77
1724	8309500	8309551	52
1725	8309595	8309623	29
1726	8309696	8309732	37
1727	8309770	8309897	128
1728	8309939	8310033	95
1729	8311113	8311169	57
1730	8311563	8311764	202
1731	8311853	8312054	202
1732	8312191	8312392	202
1733	8312763	8313156	394
1734	8313614	8313758	145
1735	8313991	8314112	122
1736	8315232	8315299	68
1737	8315309	8315432	124
1738	8316091	8316206	116
1739	8316802	8316865	64
1740	8316934	8317002	69
1741	8317038	8317566	529
1742	8317730	8317929	200
1743	8318415	8318560	146
1744	8318563	8318820	258
1745	8318870	8319071	202
1746	8319287	8319488	202
1747	8320437	8320717	281
1748	8320752	8320834	83
1749	8321320	8321441	122
1750	8325791	8325877	87
1751	8326604	8326747	144
1752	8327692	8327892	201
1753	8328036	8328148	113
1754	8328523	8328703	181
1755	8328942	8329142	201
1756	8329304	8329372	69
1757	8329424	8329504	81
1758	8330371	8330572	202
1759	8330850	8331050	201
1760	8331218	8331418	201
1761	8332970	8333171	202
1762	8333748	8333808	61
1763	8333997	8334123	127
1764	8334454	8334654	201
1765	8334716	8334916	201
1766	8335170	8335371	202
1767	8335420	8335817	398
1768	8336356	8336428	73
1769	8336466	8336557	92
1770	8338123	8338313	191
1771	8338879	8339193	315
1772	8339773	8339969	197
1773	8341389	8341592	204
1774	8341921	8342002	82
1775	8342300	8342500	201
1776	8342604	8342722	119
1777	8342844	8342918	75
1778	8343634	8343713	80
1779	8343842	8343919	78
1780	8349447	8349557	111
1781	8349617	8350164	548
1782	8350202	8350284	83
1783	8350316	8350749	434
1784	8350974	8351464	491
1785	8351487	8351548	62
1786	8351571	8351649	79
1787	8351653	8351757	105
1788	8351784	8352238	455
1789	8352264	8352956	693
1790	8353467	8353508	42
1791	8353512	8354183	672
1792	8354191	8354371	181
1793	8354582	8354732	151
1794	8354988	8355688	701
1795	8356443	8356643	201
1796	8356766	8356966	201
1797	8357915	8358116	202
1798	8358251	8358428	178
1799	8358559	8358759	201
1800	8359000	8359200	201
1801	8359523	8359794	272
1802	8359843	8359915	73
1803	8360606	8360807	202
1804	8361393	8361480	88
1805	8361488	8361594	107
1806	8362552	8362752	201
1807	8362901	8363059	159
1808	8363275	8363476	202
1809	8363877	8364078	202
1810	8364138	8364339	202
1811	8364570	8364770	201
1812	8364902	8365103	202
1813	8365304	8365504	201
1814	8366053	8366139	87
1815	8366168	8366368	201
1816	8366806	8367105	300
1817	8367721	8367784	64
1818	8367846	8367922	77
1819	8368018	8368219	202
1820	8368819	8369010	192
1821	8369261	8369376	116
1822	8372021	8372152	132
1823	8372161	8372354	194
1824	8372388	8372544	157
1825	8372546	8372721	176
1826	8372850	8372941	92
1827	8372981	8373090	110
1828	8373106	8373222	117
1829	8373259	8373352	94
1830	8373359	8373471	113
1831	8374194	8374268	75
1832	8374466	8374558	93
1833	8375119	8375247	129
1834	8375258	8375299	42
1835	8375326	8375337	12
1836	8375361	8375527	167
1837	8375904	8375932	29
1838	8375959	8376083	125
1839	8376427	8376567	141
1840	8376930	8377034	105
1841	8377115	8377478	364
1842	8377555	8377667	113
1843	8377716	8377784	69
1844	8377790	8377909	120
1845	8378001	8378203	203
1846	8378414	8378703	290
1847	8378783	8378959	177
1848	8379725	8379803	79
1849	8380088	8380424	337
1850	8380518	8380558	41
1851	8380770	8380911	142
1852	8380964	8381215	252
1853	8381322	8381481	160
1854	8381506	8381776	271
1855	8381850	8382932	1083
1856	8383002	8383082	81
1857	8383142	8383383	242
1858	8383470	8384128	659
1859	8384180	8384515	336
1860	8384545	8384692	148
1861	8384730	8384986	257
1862	8384999	8385425	427
1863	8385430	8385766	337
1864	8385780	8385867	88
1865	8386282	8386458	177
1866	8386461	8386737	277
1867	8386812	8386870	59
1868	8386931	8387538	608
1869	8387666	8387815	150
1870	8388072	8388150	79
1871	8388155	8388234	80
1872	8388249	8389367	1119
1873	8389420	8389565	146
1874	8389948	8390031	84
1875	8390054	8390118	65
1876	8390413	8390515	103
1877	8390553	8390707	155
1878	8390726	8390981	256
1879	8390983	8391101	119
1880	8391103	8391199	97
1881	8391449	8391548	100
1882	8391564	8391772	209
1883	8392328	8392360	33
1884	8392435	8393236	802
1885	8393339	8393533	195
1886	8393571	8393660	90
1887	8393665	8393812	148
1888	8393821	8394426	606
1889	8394889	8395690	802
1890	8395760	8395811	52
1891	8395858	8396449	592
1892	8396563	8396981	419
1893	8397383	8397840	458
1894	8397937	8398145	209
1895	8398160	8398304	145
1896	8398338	8398545	208
1897	8398558	8398635	78
1898	8398653	8398845	193
1899	8398850	8398923	74
1900	8398983	8399219	237
1901	8399228	8399372	145
1902	8399389	8399608	220
1903	8399859	8400023	165
1904	8400034	8400348	315
1905	8400691	8400857	167
1906	8400915	8401088	174
1907	8401090	8401534	445
1908	8401574	8401634	61
1909	8402096	8402946	851
1910	8403088	8403153	66
1911	8403199	8403272	74
1912	8403306	8403383	78
1913	8403401	8403505	105
1914	8403528	8403742	215
1915	8408200	8408294	95
1916	8413305	8413553	249
1917	8414014	8414911	898
1918	8414987	8415098	112
1919	8415100	8415412	313
1920	8415477	8416029	553
1921	8416491	8417395	905
1922	8417457	8417514	58
1923	8417531	8418465	935
1924	8418496	8418618	123
1925	8418632	8418982	351
1926	8418987	8419559	573
1927	8419592	8419834	243
1928	8419949	8421053	1105
1929	8421069	8421508	440
1930	8421534	8422301	768
1931	8422355	8422799	445
1932	8422803	8422876	74
1933	8422880	8423135	256
1934	8423220	8423772	553
1935	8423857	8424297	441
1936	8424383	8424916	534
1937	8425374	8425679	306
1938	8425704	8426308	605
1939	8426312	8426376	65
1940	8426447	8426905	459
1941	8426907	8427171	265
1942	8427177	8427329	153
1943	8427347	8427517	171
1944	8427814	8428007	194
1945	8428009	8428943	935
1946	8428970	8429264	295
1947	8429285	8429773	489
1948	8430219	8430331	113
1949	8430336	8430709	374
1950	8430769	8431146	378
1951	8431177	8431237	61
1952	8431292	8431603	312
1953	8431636	8431827	192
1954	8431946	8432142	197
1955	8432171	8432333	163
1956	8432378	8432717	340
1957	8433024	8433154	131
1958	8433181	8433979	799
1959	8433983	8434062	80
1960	8434067	8434177	111
1961	8434707	8435632	926
1962	8435681	8436826	1146
1963	8437216	8439057	1842
1964	8439065	8439469	405
1965	8439476	8439945	470
1966	8439961	8440318	358
1967	8440381	8441556	1176
1968	8441560	8442440	881
1969	8442517	8443393	877
1970	8443442	8443642	201
1971	8444027	8444512	486
1972	8444906	8445194	289
1973	8445224	8445982	759
1974	8445992	8446406	415
1975	8446408	8446894	487
1976	8446980	8447707	728
1977	8447755	8448120	366
1978	8448497	8449425	929
1979	8449480	8449692	213
1980	8449695	8451106	1412
1981	8451110	8451483	374
1982	8451561	8451676	116
1983	8451681	8452184	504
1984	8452240	8453232	993
1985	8453483	8454393	911
1986	8454460	8456267	1808
1987	8456321	8456563	243
1988	8456581	8456825	245
1989	8456902	8457129	228
1990	8457136	8458586	1451
1991	8458592	8459021	430
1992	8459042	8459286	245
1993	8459431	8462063	2633
1994	8462160	8462748	589
1995	8462774	8462924	151
1996	8463052	8464315	1264
1997	8464363	8464936	574
1998	8464973	8465110	138
[truncated: 3,276 more rows]
